# Supplementary material for: Antitumor properties and mechanisms of mitochondria-targeted Ag(i) and Au(i) complexes containing N-heterocyclic carbenes derived from cyclophanes
Source: Royal Society of Chemistry journal article supplement (doi:10.1039/c4mt00046c), 2014-04-17
Supplement: c4mt00046c1.pdf [file c4mt00046c1.pdf]

## Supporting Information

### **Antitumor Properties and Mechanisms of Mitochondria-Targeted Ag(I) and Au(I) Complexes Containing N-heterocyclic Carbenes Derived from Cyclophanes**

Yi Li, Gao-Feng Liu,\* Cai-Ping Tan, Liang-Nian Ji, and Zong-Wan Mao\*

#### Table of Contents

|                                                       |    |
|-------------------------------------------------------|----|
| Synthetic routes of complexes.....                    | S2 |
| Crystallographic data .....                           | S2 |
| Selected bond lengths and bond angles of crystal..... | S2 |
| UV/Vis and emission spectras .....                    | S3 |
| Stability of the complexes in water .....             | S3 |
| Fluorescence microscopic examination .....            | S3 |
| Cell-cycle distribution.....                          | S4 |

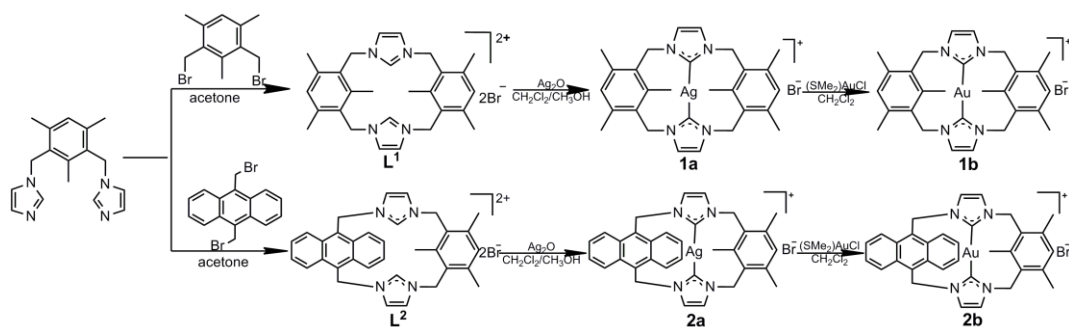

Scheme S1. Synthesis of NHC complexes **1a-b** and **2a-b**.

Table S1. Crystallographic data of complexes **1a'**, **1b'** and ligands **L<sup>1</sup>**, **L<sup>2</sup>**.

| Compound                                   | <b>1a'</b>                                                                           | <b>1b'</b>                                                                           | <b>L<sup>1</sup></b>                                                          | <b>L<sup>2</sup></b>                                                                               |
|--------------------------------------------|--------------------------------------------------------------------------------------|--------------------------------------------------------------------------------------|-------------------------------------------------------------------------------|----------------------------------------------------------------------------------------------------|
| CDCC no.                                   | 980884                                                                               | 980885                                                                               | 980882                                                                        | 980883                                                                                             |
| Empirical formula                          | C <sub>28</sub> H <sub>32</sub> AgF <sub>6</sub> N <sub>4</sub> P•CH <sub>3</sub> CN | C <sub>28</sub> H <sub>32</sub> AuF <sub>6</sub> N <sub>4</sub> P•CH <sub>3</sub> CN | C <sub>28</sub> H <sub>34</sub> F <sub>12</sub> N <sub>4</sub> P <sub>2</sub> | C <sub>33</sub> H <sub>32</sub> F <sub>12</sub> N <sub>4</sub> P <sub>2</sub> •3CH <sub>3</sub> CN |
| Molecular weight                           | 717.46                                                                               | 807.57                                                                               | 716.53                                                                        | 897.73                                                                                             |
| Description                                | Block, colourless                                                                    | Block, colourless                                                                    | Block, colourless                                                             | Block, colourless                                                                                  |
| Temperature (K)                            | 293(2)                                                                               | 150(2)                                                                               | 150(2)                                                                        | 150(2)                                                                                             |
| Crystal size (mm)                          | 0.50 × 0.40 × 0.40                                                                   | 0.20 × 0.16 × 0.14                                                                   | 0.18 × 0.14 × 0.13                                                            | 0.23 × 0.19 × 0.17                                                                                 |
| λ (Å)                                      | 0.71073                                                                              | 0.71073                                                                              | 0.71073                                                                       | 0.71073                                                                                            |
| Crystal system                             | orthorhombic                                                                         | orthorhombic                                                                         | monoclinic                                                                    | monoclinic                                                                                         |
| Space group                                | Ibam                                                                                 | Ibam                                                                                 | P21/c                                                                         | P21/n                                                                                              |
| a (Å)                                      | 17.9559(7)                                                                           | 18.7883(10)                                                                          | 8.6600(5)                                                                     | 12.9199(9)                                                                                         |
| b (Å)                                      | 18.8882(7)                                                                           | 17.8671(8)                                                                           | 19.8775(10)                                                                   | 15.8918(8)                                                                                         |
| c (Å)                                      | 17.9394(7)                                                                           | 18.1775(7)                                                                           | 11.7276(5)                                                                    | 20.2181(11)                                                                                        |
| α (°)                                      | 90.00                                                                                | 90.00                                                                                | 90.00                                                                         | 90.00                                                                                              |
| β (°)                                      | 90.00                                                                                | 90.00                                                                                | 130.999(3)                                                                    | 95.307(2)                                                                                          |
| γ (°)                                      | 90.00                                                                                | 90.00                                                                                | 90.00                                                                         | 90.00                                                                                              |
| Volume, Å <sup>3</sup>                     | 6084.2(4)                                                                            | 6102.0(5)                                                                            | 1523.61(13)                                                                   | 4133.4(4)                                                                                          |
| Z                                          | 8                                                                                    | 8                                                                                    | 2                                                                             | 4                                                                                                  |
| Absorption coefficient (mm <sup>-1</sup> ) | 0.781                                                                                | 4.940                                                                                | 0.244                                                                         | 0.198                                                                                              |
| F(000)                                     | 2920                                                                                 | 3184                                                                                 | 736                                                                           | 1848                                                                                               |
| θ range (deg)                              | 3.13-27.48                                                                           | 3.12-27.47                                                                           | 3.08/27.47                                                                    | 3.01-27.48                                                                                         |
| Completeness to θ <sub>max</sub>           | 0.986                                                                                | 0.987                                                                                | 0.974                                                                         | 0.965                                                                                              |
| Density (calcd) (mg/m <sup>3</sup> )       | 1.567                                                                                | 1.758                                                                                | 1.562                                                                         | 1.443                                                                                              |
| Reflections collected/unique               | 12864/3565                                                                           | 11507/3570                                                                           | 10629/3398                                                                    | 13658                                                                                              |
| Final R indices [I > 2σ(I)]                | R1=0.0474<br>wR2=0.1359                                                              | R1=0.0547<br>wR2=0.1377                                                              | R1=0.0683<br>wR2=0.1537                                                       | R1=0.1126<br>wR2=0.2048                                                                            |
| R indices (all data)                       | R1=0.0504<br>wR2=0.1423                                                              | R1=0.0616,<br>wR2=0.1432                                                             | R1=0.0535<br>wR2=0.1428                                                       | R1=0.0727<br>wR2=0.1815                                                                            |
| GOF                                        | 1.132                                                                                | 1.035                                                                                | 1.050                                                                         | 1.068                                                                                              |

Table S2. Selected bond lengths (Å) and bond angles (deg) of **1a'** and **1b'**.

| Complexes         | <b>1a'</b>    | <b>1b'</b> |             |          |
|-------------------|---------------|------------|-------------|----------|
| bond lengths (Å)  | Ag1-C1        | 2.113(4)   | Au1-C13     | 2.062(8) |
|                   | Ag1-C2        | 2.111(4)   | Au1-C15     | 2.075(8) |
| bond angles (deg) | C2 - Ag1 - C1 | 178.04(18) | C13-Au1-C15 | 179.4(3) |
|                   | N1 - C1 - Ag1 | 127.65(18) | N1-C1-Au1   | 127.6(4) |
|                   | N2 - C2 - Ag1 | 127.97(18) | N2-C15-Au1  | 126.9(4) |

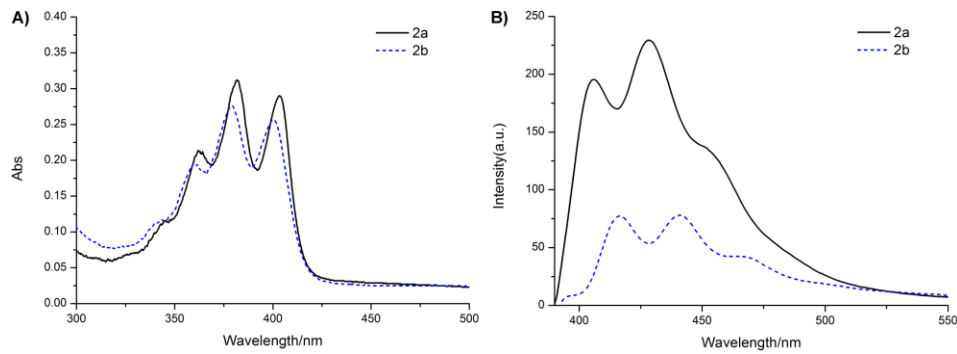

**Fig. S1** (A) UV/Vis spectra of complexes **2a** and **2b** ( $5 \times 10^{-5}$  M) measured in  $\text{CH}_3\text{OH}$  at 298 K. (B) Emission spectra of complexes **2a** and **2b** ( $5 \times 10^{-5}$  M) measured in  $\text{CH}_3\text{OH}$  at 298 K. ( $\lambda_{\text{ex}} = 380$  nm).

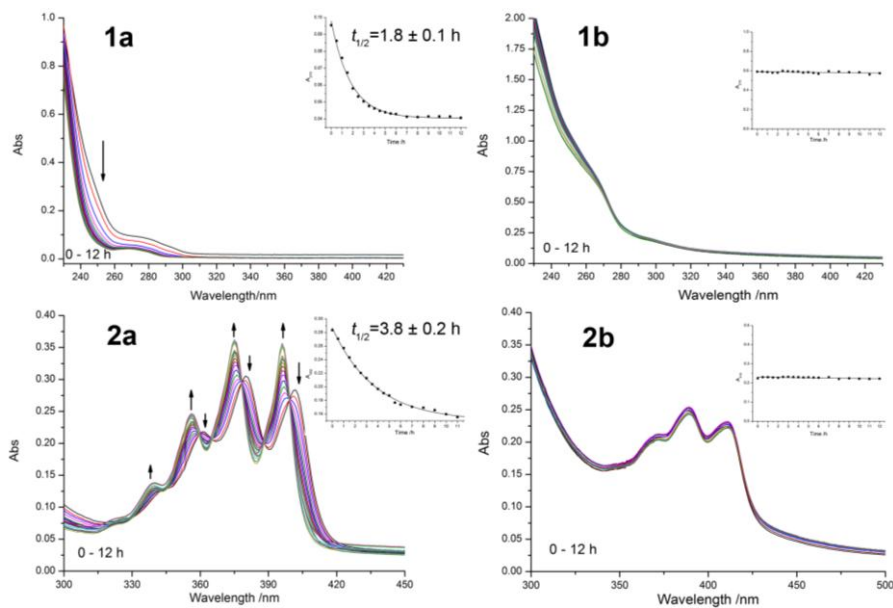

**Fig. S2** Time-dependent UV/Vis absorption spectra of **1-2** ( $5 \times 10^{-5}$  M) measured in 100 mM NaCl solution. Insets: plots of the changes in absorbance at the indicated wavelengths against time. **1a**, 270 nm; **1b**, 270nm; **2a**, 402 nm; **2b**, 410 nm.

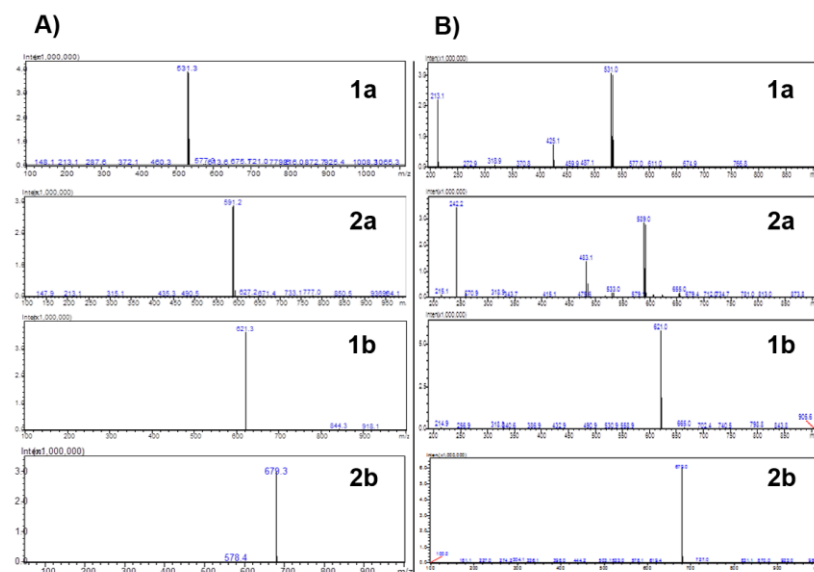

**Fig. S3** ESI-MS spectra of complexes in  $\text{H}_2\text{O}$  (0.25% DMSO for: A) 0 h and B) 48 h.

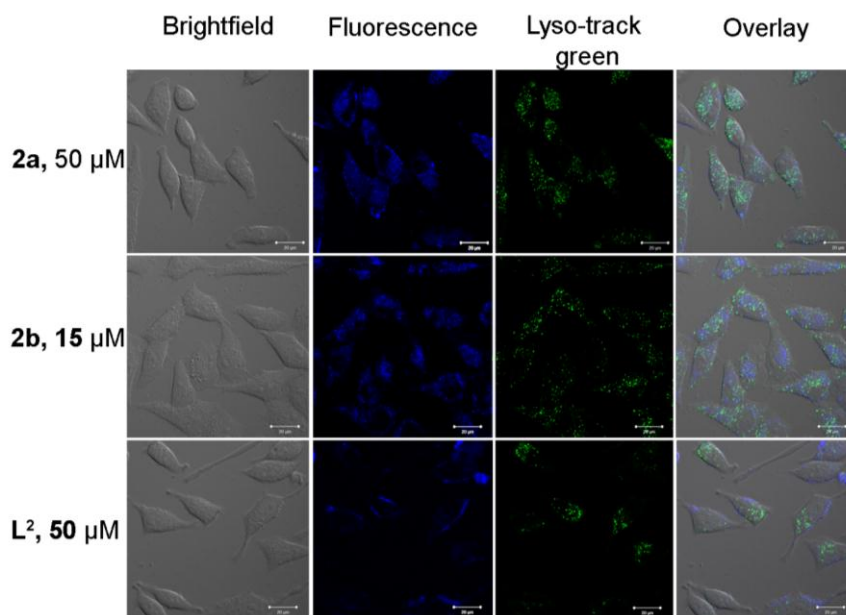

**Fig. S4** Determination of intercellular localization of compound by confocal microscopy ( $63\times$  oil-immersion objective lens). **2a**, **2b** and **L<sup>2</sup>** were excited at 405 nm (blue). Lyso-tracker green was excited at 488 nm (green).

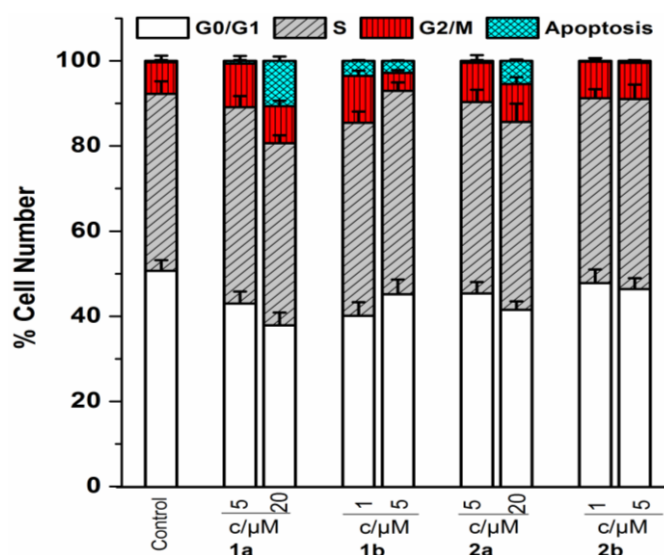

**Fig. S5** Cell-cycle analysis of HeLa cells treated with DMSO alone or **1-2** at different concentrations for 24 h before exposure to PI and analysis by flow cytometry. Cell populations were determined and are expressed as the percentage of cells in the indicated cell-cycle phases.
